# Supplementary material for: Site-directed mutagenesis around the CuA site of a polyphenol oxidase from Coreopsis grandiflora (cgAUS1)
Source: PubMed Central journal article supplement (PMC4364613; doi:10.1016/j.febslet.2015.02.009), 2015-03-24

**Site-directed mutagenesis around the CuA site of a polyphenol oxidase from *Coreopsis grandiflora* (cgAUS1)**

Cornelia Kaintz<sup>1</sup>, Rupert L. Mayer<sup>2</sup>, Franz Jirsa<sup>3</sup>, Heidi Halbwirth<sup>4</sup>, Annette Rompel<sup>1</sup>

<sup>1</sup>Universität Wien, Fakultät für Chemie, Institut für Biophysikalische Chemie, Althanstraße 14, 1090 Wien, Österreich

<sup>2</sup>Universität Wien, Department of Analytical Chemistry, Währinger Straße 38, 1090 Vienna, Austria

<sup>3</sup>Universität Wien, Department of Inorganic Chemistry, Althanstraße 14, 1090 Vienna, Austria

<sup>4</sup>University of Technology Vienna, Institute of Chemical Engineering, Getreidemarkt 9, 1060 Vienna, Austria

To whom correspondence should be addressed:

Annette Rompel

phone: +43 1 4277 52502

fax: +43 1 4277 852502

email: [annette.rompel@univie.ac.at](mailto:annette.rompel@univie.ac.at)

<http://www.bpc.univie.ac.at>

**Table S 1 Experimental settings for nanoUHPLC-ESI-MS/MS measurements and data evaluation. Sample: Chymotryptic digest of purified, recombinant enzymes (cgAUS1 wild type and mutants).**

| <b>Reduced sample ITYR; run 1 (measured by the Department of Analytical Chemistry)</b> |                                                                                                                                                                                                                                                                                                                                     |
|----------------------------------------------------------------------------------------|-------------------------------------------------------------------------------------------------------------------------------------------------------------------------------------------------------------------------------------------------------------------------------------------------------------------------------------|
| Device and operating software used                                                     | Nano-UHPLC ( <i>Dionex Corporation</i> ), Chromeleon Client Version 6.80 ( <i>Dionex Corporation</i> ); LTQ Orbitrap Velos ( <i>Thermo Scientific</i> ), LTQ Tune Plus Version 2.6.0 1065 SP3 ( <i>Thermo Scientific</i> )                                                                                                          |
| Software used (peak list generating)                                                   | Xcalibur 2.2 SP1.48 ( <i>Thermo Scientific</i> )                                                                                                                                                                                                                                                                                    |
| Acquisition parameters                                                                 | MS1 scan: m/z 200 – 3000; Filling time: 500 ms with 10 <sup>6</sup> ions; Resolution: 60.000; Fragmentation: CID with 35 eV; Peak picking: Top6 (intensity) with isolation window 3 m/z; Resolution; 7.500; Target ion previously selected for fragmentation were dynamically excluded for 60 s with relative mass window of 5 ppm. |
| <b>Search Parameters</b>                                                               |                                                                                                                                                                                                                                                                                                                                     |
| Software                                                                               | Proteome Discoverer 1.4                                                                                                                                                                                                                                                                                                             |
| Enzyme specificity                                                                     | Chymotrypsin                                                                                                                                                                                                                                                                                                                        |
| Number of miss cleavages permitted                                                     | 2                                                                                                                                                                                                                                                                                                                                   |
| Search Engine                                                                          | Sequest HT                                                                                                                                                                                                                                                                                                                          |
| Fixed modifications (including residue specificity)                                    | Carbamidomethyl (cysteine) / +57.02 Da                                                                                                                                                                                                                                                                                              |
| Variable modifications (including residue specificity)                                 | Oxidation (methionine) / +15.99 Da                                                                                                                                                                                                                                                                                                  |
| Mass tolerance for precursor ions                                                      | ±5 ppm                                                                                                                                                                                                                                                                                                                              |
| Mass tolerance for fragment ions                                                       | ±0.6 Dalton                                                                                                                                                                                                                                                                                                                         |
| Relaxed False Discovery Rate                                                           | 0.05                                                                                                                                                                                                                                                                                                                                |
| Strict False Discovery Rate                                                            | 0.01                                                                                                                                                                                                                                                                                                                                |
| Peptide result filters                                                                 | Minimum confidence = high                                                                                                                                                                                                                                                                                                           |
| Name of database searched                                                              | Sequence of pro-aurone synthase 1 added manually                                                                                                                                                                                                                                                                                    |
| Cut-off score/expectation value for accepting individual MS/MS spectra provided        | XCorr > 2.23                                                                                                                                                                                                                                                                                                                        |

**Table S 2 Parameter MIAPE (Minimum Information about a Proteomics Experiment).**

| Classification                                                                                                                                       | Definition                                                                                                                                                                                                                                                                                                                                                                                                                                                                                                                                                      |
|------------------------------------------------------------------------------------------------------------------------------------------------------|-----------------------------------------------------------------------------------------------------------------------------------------------------------------------------------------------------------------------------------------------------------------------------------------------------------------------------------------------------------------------------------------------------------------------------------------------------------------------------------------------------------------------------------------------------------------|
| <b>1. Ion sources — 1.1 Electrospray Ionisation (ESI)</b>                                                                                            |                                                                                                                                                                                                                                                                                                                                                                                                                                                                                                                                                                 |
| Supply type (static, or fed)                                                                                                                         | fed by nano-HPLC via                                                                                                                                                                                                                                                                                                                                                                                                                                                                                                                                            |
| Interface manufacturer, model                                                                                                                        | Nanospray Flex Ion Source (Thermo Scientific)                                                                                                                                                                                                                                                                                                                                                                                                                                                                                                                   |
| Sprayer type, manufacturer, model                                                                                                                    | Nanospray Flex Ion Source (Thermo Scientific)                                                                                                                                                                                                                                                                                                                                                                                                                                                                                                                   |
| Other parameters if discriminant for the experiment                                                                                                  | none                                                                                                                                                                                                                                                                                                                                                                                                                                                                                                                                                            |
| <b>2. Post source component — 3.1 Analyser</b>                                                                                                       |                                                                                                                                                                                                                                                                                                                                                                                                                                                                                                                                                                 |
| Ion optics, 'simple' quadrupole, hexapole, Paul trap, linear trap, magnetic sector, FT-ICR, Orbitrap: name of the analyser(s)                        | MS1 survey scans in Orbitrap and MS2 analysed in LTQ ion trap                                                                                                                                                                                                                                                                                                                                                                                                                                                                                                   |
| Time-of-Flight drift tube: Reflectron status                                                                                                         | no TOF used                                                                                                                                                                                                                                                                                                                                                                                                                                                                                                                                                     |
| <b>3. Post-source component — 3.2 Activation / dissociation</b>                                                                                      |                                                                                                                                                                                                                                                                                                                                                                                                                                                                                                                                                                 |
| Instrument component where the activation /dissociation occurs                                                                                       | collision-induced dissociation (CID) in ion trap                                                                                                                                                                                                                                                                                                                                                                                                                                                                                                                |
| Gas type (when used)                                                                                                                                 | Helium                                                                                                                                                                                                                                                                                                                                                                                                                                                                                                                                                          |
| Activation / dissociation type                                                                                                                       | CID                                                                                                                                                                                                                                                                                                                                                                                                                                                                                                                                                             |
| <b>4. Spectrum and peak list generation and annotation — 4.1 Data acquisition</b>                                                                    |                                                                                                                                                                                                                                                                                                                                                                                                                                                                                                                                                                 |
| Software name and version                                                                                                                            | LTQ Tune Plus Version 2.6.0 1065 SP3 (Thermo Scientific) HPLC<br>Software : Chromeleon (Dionex Corporation), Chromeleon Client Version 6.80                                                                                                                                                                                                                                                                                                                                                                                                                     |
| Acquisition parameters                                                                                                                               | The MS1 scan (m/z 400 to 1400) was acquired in the Orbitrap with 10 <sup>6</sup> ions (maximum filling time of 500 ms) and a resolution set to 60,000. Fragmentation was performed in the LTQ iontrap by collision-induced dissociation at 35 eV collision energy selecting the 10 most intense precursor ions (top10) with an isolation window of 3 m/z units, fragments were measured with a resolution of 7,500 in the Orbitrap. Target ions previously selected for fragmentation were dynamically excluded for 180 s with a relative mass window of 5 ppm. |
| <b>4. Spectrum and peak list generation and annotation — 4.2 Data analysis</b>                                                                       |                                                                                                                                                                                                                                                                                                                                                                                                                                                                                                                                                                 |
| Software name and version                                                                                                                            | Manual data analysis: Qual Browser as part of Xcalibur 2.2 SP1.48 (Thermo Scientific)<br>Automatic data analysis: PEAKS Studio 6.0                                                                                                                                                                                                                                                                                                                                                                                                                              |
| <b>4. Spectrum and peak list generation and annotation — 4.3 Resulting data</b>                                                                      |                                                                                                                                                                                                                                                                                                                                                                                                                                                                                                                                                                 |
| Location of source ('raw') and processed files                                                                                                       | -                                                                                                                                                                                                                                                                                                                                                                                                                                                                                                                                                               |
| The chromatogram(s) for SRM data and other relevant cases                                                                                            | -                                                                                                                                                                                                                                                                                                                                                                                                                                                                                                                                                               |
| m/z and intensity values                                                                                                                             | see spectra                                                                                                                                                                                                                                                                                                                                                                                                                                                                                                                                                     |
| MS level                                                                                                                                             | MS1 and MS2                                                                                                                                                                                                                                                                                                                                                                                                                                                                                                                                                     |
| Ion mode                                                                                                                                             | positive                                                                                                                                                                                                                                                                                                                                                                                                                                                                                                                                                        |
| For MS level 2 and higher, precursor m/z and charge if known, with the full mass spectrum / peaklist containing that precursor peak, where available | see corresponding spectra                                                                                                                                                                                                                                                                                                                                                                                                                                                                                                                                       |

**Table S 3 List of peptides found by nanoUHPLC-ESI-MS/MS protein identification experiments of purified recombinant cgAUS1 wild type.**

| start-end | sequence                         | modifications        | XCorr | delta mass [PPM] | peptide mass [M+H] <sup>+</sup> |
|-----------|----------------------------------|----------------------|-------|------------------|---------------------------------|
| 102-119   | TQVDSGFPDIDIQHNSW                |                      | 5,52  | 2071,97319       | 0,56                            |
| 133-145   | ERILGSLIDEPNF                    |                      | 4,89  | 1502,78435       | -0,44                           |
| 137-145   | GSLIDEPNF                        |                      | 2,81  | 991,4727         | -0,45                           |
| 140-149   | IDEPNFALPY                       |                      | 3,21  | 1178,5728        | -0,05                           |
| 150-164   | WKWDEPKGmPISNIF                  | M9(Oxidation)        | 3,22  | 1863,90862       | -0,7                            |
| 150-164   | WKWDEPKGMPISNIF                  |                      | 4,58  | 1847,91521       | 0,11                            |
| 151-164   | KWDEPKGMPISNIF                   |                      | 4,31  | 1661,8366        | 0,55                            |
| 153-164   | DEPKGmPISNIF                     | M6(Oxidation)        | 3,47  | 1363,65593       | -0,27                           |
| 153-164   | DEPKGMPISNIF                     |                      | 3,2   | 1347,6624        | 0,75                            |
| 177-189   | RDANHIEDRIVDL                    |                      | 3,3   | 1565,80351       | 0,25                            |
| 177-191   | RDANHIEDRIVDLDY                  |                      | 4,12  | 1843,88816       | -2,84                           |
| 177-208   | RDANHIEDRIVDLDYDGKDKDIPDQQQVAcNL | C30(Carbamidomethyl) | 5,06  | 3768,78676       | -0,43                           |
| 190-208   | DYDGKDKDIPDQQQVAcNL              | C17(Carbamidomethyl) | 3,39  | 2222,00425       | 0,52                            |
| 190-212   | DYDGKDKDIPDQQQVAcNLSTVY          | C17(Carbamidomethyl) | 4,85  | 2672,21555       | 0,38                            |
| 192-208   | DGKDKDIPDQQQVAcNL                | C15(Carbamidomethyl) | 2,96  | 1943,91355       | 0,37                            |
| 192-212   | DGKDKDIPDQQQVAcNLSTVY            | C15(Carbamidomethyl) | 4,66  | 2394,12412       | -0,07                           |
| 213-225   | RDLVRNGVDPTSF                    |                      | 2,35  | 1475,76225       | 1,4                             |
| 213-226   | RDLVRNGVDPTSFF                   |                      | 3,45  | 1622,82988       | 0,78                            |
| 231-258   | VAGDSPVANGDPSVGSVEAGSHTAVHRW     |                      | 5,64  | 2759,31168       | -0,6                            |
| 259-274   | VGDPTQPNNEDmGNFY                 | M12(Oxidation)       | 4,16  | 1813,73418       | 0,4                             |
| 259-274   | VGDPTQPNNEDMGNFY                 |                      | 4,54  | 1797,74089       | 1,31                            |
| 275-283   | SAGYDPVFY                        |                      | 2,38  | 1018,4514        | -0,25                           |

|         |                 |                      |      |            |       |
|---------|-----------------|----------------------|------|------------|-------|
| 300-313 | RLPGHVDITDPDWL  |                      | 4,23 | 1633,83306 | -0,19 |
| 318-326 | VFYDENKDL       |                      | 2,89 | 1142,53691 | 0,39  |
| 320-330 | YDENKDLVRVY     |                      | 4,38 | 1413,69902 | -1,34 |
| 321-330 | DENKDLVRVY      |                      | 3,41 | 1250,63786 | 0,22  |
| 331-342 | NKDcVNLDKLY     | C4(Carbamidomethyl)  | 4,69 | 1509,77469 | 1,09  |
| 343-354 | NFIENSKEVFPW    |                      | 3,68 | 1509,73784 | 0,34  |
| 345-354 | IENSKEVFPW      |                      | 3,25 | 1248,62627 | 0,24  |
| 421-431 | DSGKFVKFDVF     |                      | 3,35 | 1288,65923 | 1,51  |
| 429-441 | DVfVNDKLDGVF    |                      | 3,94 | 1495,77959 | 0,26  |
| 432-441 | VNDKLDGVF       |                      | 3,67 | 1134,61638 | 0,85  |
| 442-453 | TTPcDPEYAGGF    | C4(Carbamidomethyl)  | 4,09 | 1314,52519 | -4,22 |
| 489-502 | ATVTLVPRTGcEDL  | C11(Carbamidomethyl) | 2,88 | 1531,77947 | 0,6   |
| 503-517 | TVGEIKIELVPIPKA |                      | 3,42 | 1606,97942 | 0,94  |

**Table S 4 List of peptides found by nanoUHPLC-ESI-MS/MS protein identification experiments of purified recombinant cgAUS1 H93A mutant. Peptides identifying the mutation are marked in green.**

| start-end | sequence                                         | modifications        | XCorr | delta mass [PPM] | peptide mass [M+H] <sup>+</sup> |
|-----------|--------------------------------------------------|----------------------|-------|------------------|---------------------------------|
| 79-86     | PDDPRSF                                          |                      | 2,48  | 948,40563        | -0,18                           |
| 87-96     | VSQAKIAcAY                                       | C8(Carbamidomethyl)  | 4,03  | 1110,56169       | 0,4                             |
| 133-145   | ERILGSLIDEPNF                                    |                      | 4,81  | 1502,78508       | 0,05                            |
| 140-149   | IDEPNFALPY                                       |                      | 2,81  | 1178,5728        | -0,05                           |
| 150-164   | WKWDEPKGMPISNIF                                  |                      | 4,26  | 1847,91582       | 0,44                            |
| 151-164   | KWDEPKGmPISNIF                                   | M8(Oxidation)        | 2,33  | 1677,83091       | 0,18                            |
| 151-164   | KWDEPKGMPISNIF                                   |                      | 3,83  | 1661,8344        | -0,77                           |
| 153-164   | DEPKGmPISNIF                                     | M6(Oxidation)        | 3,62  | 1363,65666       | 0,26                            |
| 153-164   | DEPKGMPISNIF                                     |                      | 3,19  | 1347,66142       | 0,02                            |
| 177-189   | RDANHIEDRIVDL                                    |                      | 3,33  | 1565,8035        | 0,24                            |
| 177-191   | RDANHIEDRIVLDLY                                  |                      | 3,88  | 1843,88944       | -2,14                           |
| 177-208   | RDANHIEDRIVLDLYDGKDKDIPDQQQVAcNL                 | C30(Carbamidomethyl) | 3,99  | 3768,78896       | 0,16                            |
| 190-208   | DYDGKDKDIPDQQQVAcNL                              | C17(Carbamidomethyl) | 3,59  | 2222,00498       | 0,85                            |
| 190-212   | DYDGKDKDIPDQQQVAcNLSTVY                          | C17(Carbamidomethyl) | 4,29  | 2672,20731       | -2,71                           |
| 192-208   | DGKDKDIPDQQQVAcNL                                | C15(Carbamidomethyl) | 2,99  | 1943,9141        | 0,65                            |
| 192-212   | DGKDKDIPDQQQVAcNLSTVY                            | C15(Carbamidomethyl) | 4,11  | 2394,12357       | -0,29                           |
| 213-225   | RDLVRNGVDPTSF                                    |                      | 2,74  | 1475,76006       | -0,09                           |
| 213-226   | RDLVRNGVDPTSFF                                   |                      | 3,28  | 1622,82927       | 0,41                            |
| 231-258   | VAGDSPVANGDPSVGSVEAGSHTAVHRW                     |                      | 4,44  | 2759,31484       | 0,55                            |
| 231-274   | VAGDSPVANGDPSVGSVEAGSHTAVHRWVGDPQTQ<br>NNEDMGNFY |                      | 3,86  | 4538,03676       | 0,6                             |
| 259-274   | VGDPQTQNNEDmGNFY                                 | M12(Oxidation)       | 4,21  | 1813,7321        | -0,74                           |
| 259-274   | VGDPQTQNNEDMGNFY                                 |                      | 4,37  | 1797,73979       | 0,7                             |

|         |                     |                                  |      |            |       |
|---------|---------------------|----------------------------------|------|------------|-------|
| 300-313 | RLPGHVDITDPDWL      |                                  | 3,53 | 1633,83208 | -0,78 |
| 318-326 | VFYDENKDL           |                                  | 2,7  | 1142,53655 | 0,07  |
| 320-330 | YDENKDLVRVY         |                                  | 4,23 | 1413,69817 | -1,94 |
| 321-330 | DENKDLVRVY          |                                  | 3,65 | 1250,63823 | 0,51  |
| 331-340 | NKDcVNLDKL          | C4(Carbamidomethyl)              | 3,52 | 1218,61521 | 0,37  |
| 331-342 | NKDcVNLDKLY         | C4(Carbamidomethyl)              | 5,17 | 1509,77286 | -0,12 |
| 343-354 | NFIENSKEVFPW        |                                  | 3,75 | 1509,73808 | 0,51  |
| 345-354 | IENSKEVFPW          |                                  | 3,08 | 1248,62651 | 0,43  |
| 421-431 | DSGKFVKFDVF         |                                  | 3,43 | 1288,65837 | 0,85  |
| 429-441 | DVfVNDKLKDGvf       |                                  | 4,01 | 1495,78044 | 0,83  |
| 442-453 | TTPcDPEYAGGF        | C4(Carbamidomethyl)              | 4,33 | 1314,52971 | -0,79 |
| 432-441 | VNDKLKDGvf          |                                  | 3,16 | 1134,61601 | 0,53  |
| 454-472 | AQIPHNDKRSmVmTSTARF | M11(Oxidation)<br>M13(Oxidation) | 2,48 | 2222,08193 | 0,6   |
| 489-502 | ATVTLVPRTGcEDL      | C11(Carbamidomethyl)             | 2,89 | 1531,77983 | 0,84  |
| 503-517 | TVGEIKIELVPIPKA     |                                  | 3,56 | 1606,97807 | 0,1   |

**Table S 5 List of peptides found by nanoUHPLC-ESI-MS/MS protein identification experiments of purified recombinant cgAUS1 H116A mutant.**

Peptides identifying the mutation are marked in green.

| start-end | sequence                         | modifications        | XCorr | delta mass [PPM] | peptide mass [M+H] <sup>+</sup> |
|-----------|----------------------------------|----------------------|-------|------------------|---------------------------------|
| 79-86     | PDD DPRSF                        |                      | 2,53  | 0,85             | 948,4066                        |
| 102-119   | TQVDSGFPDIDIQIANSW               |                      | 6,28  | 0,18             | 2005,95061                      |
| 133-145   | ERILGSLIDEPNF                    |                      | 4,91  | -0,12            | 1502,78484                      |
| 137-145   | GSLIDEPNF                        |                      | 2,99  | 0,04             | 991,47319                       |
| 140-145   | IDEPNF                           |                      | 2,37  | -1,94            | 734,33415                       |
| 140-149   | IDEPNFALPY                       |                      | 3,02  | 0,57             | 1178,57353                      |
| 150-164   | WKWDEPKGmPISNIF                  | M9(Oxidation)        | 3,62  | -0,24            | 1863,90947                      |
| 150-164   | WKWDEPKGMPISNIF                  |                      | 4,57  | -0,35            | 1847,91435                      |
| 151-164   | KWDEPKGmPISNIF                   | M8(Oxidation)        | 3,89  | -0,13            | 1677,83037                      |
| 151-164   | KWDEPKGMPISNIF                   |                      | 4,38  | 1,06             | 1661,83745                      |
| 153-164   | DEPKGmPISNIF                     | M6(Oxidation)        | 3,63  | -0,01            | 1363,6563                       |
| 153-164   | DEPKGMPISNIF                     |                      | 3,73  | 0,02             | 1347,66142                      |
| 177-189   | RDANHIEDRIVDL                    |                      | 3,09  | 0,48             | 1565,80387                      |
| 177-191   | RDANHIEDRIVDLDY                  |                      | 3,08  | -0,02            | 1843,89336                      |
| 177-208   | RDANHIEDRIVDLDYDGKDKDIPDQQQVAcNL | C30(Carbamidomethyl) | 4,43  | -1,14            | 3768,78408                      |
| 190-208   | DYDGKDKDIPDQQQVAcNL              | C17(Carbamidomethyl) | 4,06  | 0,35             | 2222,00388                      |
| 190-212   | DYDGKDKDIPDQQQVAcNLSTVY          | C17(Carbamidomethyl) | 4,5   | 0,22             | 2672,21514                      |
| 192-208   | DGKDKDIPDQQQVAcNL                | C15(Carbamidomethyl) | 2,86  | 1,22             | 1943,9152                       |
| 192-212   | DGKDKDIPDQQQVAcNLSTVY            | C15(Carbamidomethyl) | 4,85  | -1,52            | 2394,12064                      |
| 213-225   | RDLVRNGVDPTSF                    |                      | 3,04  | -0,42            | 1475,75957                      |
| 213-226   | RDLVRNGVDPTSFF                   |                      | 3,48  | 0,63             | 1622,82964                      |



|         |                              |                      |      |       |            |
|---------|------------------------------|----------------------|------|-------|------------|
| 231-258 | VAGDSPVANGDPSVGSVEAGSHTAVHRW |                      | 4,33 | 0,1   | 2759,31362 |
| 259-274 | VGDPTQPNNEDmGNFY             | M12(Oxidation)       | 3,92 | 0,27  | 1813,73393 |
| 259-274 | VGDPTQPNNEDMGNFY             |                      | 4,74 | 1,25  | 1797,74077 |
| 275-283 | SAGYDPVFY                    |                      | 2,34 | -1,39 | 1018,45024 |
| 300-313 | RLPGHVDITDPDWL               |                      | 4,33 | -0,93 | 1633,83183 |
| 318-326 | VFYDENKDL                    |                      | 2,82 | 0,39  | 1142,53691 |
| 320-330 | YDENKDLVRVY                  |                      | 3,85 | -3,32 | 1413,69621 |
| 321-330 | DENKDLVRVY                   |                      | 3,64 | 0,32  | 1250,63799 |
| 331-342 | NKDcVNLDKLY                  | C4(Carbamidomethyl)  | 4,8  | -0,61 | 1509,77213 |
| 343-354 | NFIENSKEVFPW                 |                      | 3,94 | 0,1   | 1509,73747 |
| 345-354 | IENSKEVFPW                   |                      | 3,26 | 0,43  | 1248,62651 |
| 421-431 | DSGKFVKFDVF                  |                      | 3,16 | 1,42  | 1288,65911 |
| 429-441 | DVFNLDKLDGVF                 |                      | 3,63 | -0,23 | 1495,77886 |
| 432-441 | VNDKLDGVF                    |                      | 3,71 | 0,42  | 1134,61589 |
| 442-453 | TTPcDPEYAGGF                 | C4(Carbamidomethyl)  | 4,1  | -2,74 | 1314,52715 |
| 489-502 | ATVTLVPRTGcEDL               | C11(Carbamidomethyl) | 3,17 | 0,6   | 1531,77947 |
| 503-517 | TVGEIKIELVPIPKA              |                      | 3,8  | 0,33  | 1606,97844 |

**Table S 6 List of peptides found by nanoUHPLC-ESI-MS/MS protein identification experiments of purified recombinant cgAUS1 H125A mutant.**

**Peptides identifying the mutation were not found.**

| start-end | sequence                                     | modifications        | XCorr | delta mass [PPM] | peptide mass [M+H] <sup>+</sup> |
|-----------|----------------------------------------------|----------------------|-------|------------------|---------------------------------|
| 79-86     | PDD DPRSF                                    |                      | 2,45  | 948,40599        | 0,2                             |
| 133-145   | ERILGSLIDEPNF                                |                      | 4,73  | 1502,78423       | -0,52                           |
| 140-149   | IDEPNFALPY                                   |                      | 3,2   | 1178,5728        | -0,05                           |
| 150-164   | WKWDEPKGMPISNIF                              |                      | 4,05  | 1847,91484       | -0,09                           |
| 150-164   | WKWDEPKGmPISNIF                              | M9(Oxidation)        | 2,72  | 1863,9052        | -2,53                           |
| 151-164   | KWDEPKGMPISNIF                               |                      | 4,2   | 1661,83562       | -0,04                           |
| 153-164   | DEPKGMPISNIF                                 |                      | 3,84  | 1347,66118       | -0,16                           |
| 153-164   | DEPKGmPISNIF                                 | M6(Oxidation)        | 3,55  | 1363,65483       | -1,08                           |
| 177-189   | RDANHIEDRIVDL                                |                      | 3,39  | 1565,80315       | 0,02                            |
| 177-191   | RDANHIEDRIVDL DY                             |                      | 3,78  | 1843,88834       | -2,74                           |
| 177-208   | RDANHIEDRIVDL DYDGKDKDIPDQQQVAcNL            | C30(Carbamidomethyl) | 5,34  | 3768,7853        | -0,82                           |
| 190-208   | DYDGKDKDIPDQQQVAcNL                          | C17(Carbamidomethyl) | 3,13  | 2222,00461       | 0,68                            |
| 190-212   | DYDGKDKDIPDQQQVAcNLSTVY                      | C17(Carbamidomethyl) | 4,29  | 2672,21408       | -0,17                           |
| 192-208   | DGKDKDIPDQQQVAcNL                            | C15(Carbamidomethyl) | 2,77  | 1943,9152        | 1,22                            |
| 192-212   | DGKDKDIPDQQQVAcNLSTVY                        | C15(Carbamidomethyl) | 3,89  | 2394,1232        | -0,45                           |
| 213-225   | RDLVRNGVDPTS F                               |                      | 2,68  | 1475,76274       | 1,73                            |
| 213-226   | RDLVRNGVDPTS FF                              |                      | 3,08  | 1622,82976       | 0,71                            |
| 231-258   | VAGDSPVANGDPSVGSVEAGSHTAVHRW                 |                      | 4,13  | 2759,31557       | 0,81                            |
| 231-274   | VAGDSPVANGDPSVGSVEAGSHTAVHRWVGDPTQPNNEDmGNFY | M40(Oxidation)       | 4,32  | 4554,03139       | 0,54                            |
| 259-274   | VGDPTQPNNEDMGNFY                             |                      | 4,69  | 1797,73796       | -0,32                           |
| 259-274   | VGDPTQPNNEDmGNFY                             | M12(Oxidation)       | 4,54  | 1813,73332       | -0,07                           |
| 300-313   | RLPGHVDITDPDWL                               |                      | 3,72  | 1633,8333        | -0,04                           |

|         |                          |                      |      |            |       |
|---------|--------------------------|----------------------|------|------------|-------|
| 318-326 | VFYDENKDL                |                      | 2,89 | 1142,53667 | 0,17  |
| 320-330 | YDENKDLVRVY              |                      | 4,46 | 1413,69621 | -3,32 |
| 321-330 | DENKDLVRVY               |                      | 3,89 | 1250,63835 | 0,61  |
| 331-340 | NKDcVNLDKL               | C4(Carbamidomethyl)  | 3,29 | 1218,61493 | 0,15  |
| 331-342 | NKDcVNLDKLY              | C4(Carbamidomethyl)  | 4,63 | 1509,77369 | 0,42  |
| 343-354 | NFIENSKEVFPW             |                      | 3,43 | 1509,73796 | 0,42  |
| 345-354 | IENSKEVFPW               |                      | 3,1  | 1248,62712 | 0,92  |
| 421-431 | DSGKFVKFDVF              |                      | 3,77 | 1288,65715 | -0,1  |
| 429-441 | DVfVNDKLDGVF             |                      | 4,16 | 1495,77873 | -0,31 |
| 432-441 | VNDKLDGVF                |                      | 3,24 | 1134,61528 | -0,11 |
| 442-453 | TTPcDPEYAGGF             | C4(Carbamidomethyl)  | 4,18 | 1314,52715 | -2,74 |
| 454-472 | AQIPHNDKRSMVmTSTARF      | M13(Oxidation)       | 2,18 | 2206,0873  | 0,74  |
| 489-502 | ATVTLVPRTGcEDL           | C11(Carbamidomethyl) | 2,9  | 1531,77971 | 0,76  |
| 494-517 | VPRTGcEDLTVGEIKIELVPIPKA | C6(Carbamidomethyl)  | 3,35 | 2634,45424 | 0,23  |
| 503-517 | TVGEIKIELVPIPKA          |                      | 3,57 | 1606,97843 | 0,32  |

**Table S 7 List of peptides found by nanoUHPLC-ESI-MS/MS protein identification experiments of purified recombinant cgAUS1 F273A mutant.**

Peptides identifying the mutation are marked in green.

| start-end | sequence                         | modifications        | XCorr | delta mass [PPM] | peptide mass [M+H] <sup>+</sup> |
|-----------|----------------------------------|----------------------|-------|------------------|---------------------------------|
| 79-86     | PDDPRS                           |                      | 2,3   | 948,40599        | 0,2                             |
| 102-119   | TQVDSGFPDIDIQHNSW                |                      | 5,92  | 2071,97173       | -0,15                           |
| 131-136   | FYERIL                           |                      | 2,15  | 840,46245        | 1,2                             |
| 133-145   | ERILGSLIDEPNF                    |                      | 4,82  | 1502,78447       | -0,36                           |
| 137-145   | GSLIDEPNF                        |                      | 3,03  | 991,47301        | -0,14                           |
| 140-145   | IDEPNF                           |                      | 1,95  | 734,3333         | -3,11                           |
| 140-149   | IDEPNFALPY                       |                      | 3,34  | 1178,5728        | -0,05                           |
| 150-164   | WKWDEPKGmPISNIF                  | M9(Oxidation)        | 3,83  | 1863,90911       | -0,44                           |
| 150-164   | WKWDEPKGMPISNIF                  |                      | 4,58  | 1847,91252       | -1,34                           |
| 151-164   | KWDEPKGmPISNIF                   | M8(Oxidation)        | 3,59  | 1677,83025       | -0,21                           |
| 151-164   | KWDEPKGMPISNIF                   |                      | 4,3   | 1661,83476       | -0,55                           |
| 153-164   | DEPKGmPISNIF                     | M6(Oxidation)        | 3,48  | 1363,6563        | -0,01                           |
| 153-164   | DEPKGMPISNIF                     |                      | 3,57  | 1347,66216       | 0,57                            |
| 174-189   | DQYRDANHIEDRIVDL                 |                      | 3,83  | 1971,95157       | -0,2                            |
| 177-189   | RDANHIEDRIVDL                    |                      | 3,2   | 1565,80222       | -0,58                           |
| 177-191   | RDANHIEDRIVDLDY                  |                      | 3,64  | 1843,88651       | -3,73                           |
| 177-208   | RDANHIEDRIVDLDYDGKDKDIPDQQQVAcNL | C30(Carbamidomethyl) | 6,06  | 3768,78586       | -0,67                           |
| 190-208   | DYDGKDKDIPDQQQVAcNL              | C17(Carbamidomethyl) | 3,25  | 2222,0037        | 0,27                            |
| 190-212   | DYDGKDKDIPDQQQVAcNLSTVY          | C17(Carbamidomethyl) | 4,42  | 2672,20639       | -3,05                           |
| 192-208   | DGKDKDIPDQQQVAcNL                | C15(Carbamidomethyl) | 2,83  | 1943,91465       | 0,94                            |
| 192-212   | DGKDKDIPDQQQVAcNLSTVY            | C15(Carbamidomethyl) | 5,33  | 2394,12383       | -0,19                           |

|         |                                                      |                      |      |            |       |
|---------|------------------------------------------------------|----------------------|------|------------|-------|
| 213-225 | RDLVRNGVDPTSF                                        |                      | 2,69 | 1475,75969 | -0,34 |
| 213-226 | RDLVRNGVDPTSFF                                       |                      | 3,37 | 1622,82988 | 0,78  |
| 213-274 | VAGDSPVANGDPSVGSVEAGSHTAVHRWVGDPTQPNNEDMGNA <b>Y</b> |                      | 6,45 | 4462,00161 | -0,25 |
| 231-258 | VAGDSPVANGDPSVGSVEAGSHTAVHRW                         |                      | 5,88 | 2759,31424 | 0,33  |
| 259-274 | VGDPTQPNNEDmGNA <b>Y</b>                             | M12(Oxidation)       | 3,84 | 1737,70244 | 0,17  |
| 259-274 | VGDPTQPNNEDMGNA <b>Y</b>                             |                      | 3,78 | 1721,70647 | -0,44 |
| 275-283 | SAGYDPVFY                                            |                      | 2,53 | 1018,45043 | -1,21 |
| 300-313 | RLPGHVDITDPDWL                                       |                      | 3,92 | 1633,83159 | -1,08 |
| 318-326 | VFYDENKDL                                            |                      | 2,94 | 1142,53777 | 1,13  |
| 320-330 | YDENKDLVRVY                                          |                      | 4,34 | 1413,69805 | -2,03 |
| 321-330 | DENKDLVRVY                                           |                      | 3,89 | 1250,63762 | 0,02  |
| 331-342 | NKDcVNLDKLY                                          | C4(Carbamidomethyl)  | 5,28 | 1509,77039 | -1,76 |
| 343-354 | NFIENSKEVFPW                                         |                      | 4,06 | 1509,73711 | -0,14 |
| 345-354 | IENSKEVFPW                                           |                      | 3,46 | 1248,62724 | 1,02  |
| 414-420 | LIKKIKY                                              |                      | 1,94 | 905,61815  | -0,14 |
| 421-431 | DSGKFVKFDVF                                          |                      | 3,47 | 1288,65874 | 1,13  |
| 426-431 | VKFDVF                                               |                      | 1,96 | 754,41271  | -0,97 |
| 429-441 | DVFNKLDKDGVF                                         |                      | 3,94 | 1495,77995 | 0,5   |
| 432-441 | VNDKLDKDGVF                                          |                      | 2,42 | 1134,61626 | 0,75  |
| 442-453 | TTPcDPEYAGGF                                         | C4(Carbamidomethyl)  | 3,94 | 1314,53154 | 0,61  |
|         |                                                      | M11(Oxidation)       |      |            |       |
| 454-472 | AQIPHNDKRSmVmTSTARF                                  | M13(Oxidation)       | 2,48 | 2222,07949 | -0,5  |
| 454-472 | AQIPHNDKRSMVmTSTARF                                  | M13(Oxidation)       | 2,06 | 2206,08413 | -0,7  |
| 489-502 | ATVTLVPRTGcEDL                                       | C11(Carbamidomethyl) | 2,97 | 1531,77886 | 0,2   |
| 494-517 | VPRTGcEDLTVGEIKIELVPIPKA                             | C6(Carbamidomethyl)  | 5    | 2634,45444 | 0,3   |
| 503-517 | TVGEIKIELVPIPKA                                      |                      | 3,65 | 1606,97966 | 1,09  |

**Table S 8 List of peptides found by nanoUHPLC-ESI-MS/MS protein identification experiments of purified recombinant cgAUS1 C97A mutant. Peptides identifying the mutation were not found.**

| start-end | sequence                        | modifications        | XCorr | delta mass [PPM] | peptide mass [M+H] <sup>+</sup> |
|-----------|---------------------------------|----------------------|-------|------------------|---------------------------------|
| 79-86     | PDD DPRSF                       |                      | 2,81  | -0,44            | 948,40538                       |
| 102-119   | TQVDSGFPDIDIQHNSW               |                      | 5,65  | 0,08             | 2071,97222                      |
| 133-145   | ERILGSLIDEPNF                   |                      | 4,22  | 0,29             | 1502,78545                      |
| 140-149   | IDEPNFALPY                      |                      | 2,82  | 0,36             | 1178,57329                      |
| 150-164   | WKWDEPKGmPISNIF                 | M9(Oxidation)        | 3,56  | -0,7             | 1863,90862                      |
| 150-164   | WKWDEPKGMPISNIF                 |                      | 4,62  | -0,42            | 1847,91423                      |
| 151-164   | KWDEPKGMPISNIF                  |                      | 4,34  | -0,55            | 1661,83476                      |
| 153-164   | DEPKGmPISNIF                    | M6(Oxidation)        | 3,64  | 0,62             | 1363,65715                      |
| 153-164   | DEPKGMPISNIF                    |                      | 3,58  | -0,61            | 1347,66057                      |
| 177-189   | RDANHIEDRIVDL                   |                      | 3,31  | 0,13             | 1565,80332                      |
| 177-191   | RDANHIEDRIVLDY                  |                      | 3,95  | -1,55            | 1843,89054                      |
| 177-208   | RDANHIEDRIVLDYDGKDKDIPDQQQVAcNL | C30(Carbamidomethyl) | 4,81  | 2,36             | 3768,79726                      |
| 190-208   | DYDGKDKDIPDQQQVAcNL             | C17(Carbamidomethyl) | 3,27  | 0,35             | 2222,00388                      |
| 190-212   | DYDGKDKDIPDQQQVAcNLSTVY         | C17(Carbamidomethyl) | 4,23  | -2,5             | 2672,20786                      |
| 192-208   | DGKDKDIPDQQQVAcNL               | C15(Carbamidomethyl) | 2,57  | 0,37             | 1943,91355                      |
| 192-212   | DGKDKDIPDQQQVAcNLSTVY           | C15(Carbamidomethyl) | 3,29  | -0,07            | 2394,12412                      |
| 213-225   | RDLVRNGVDPTSF                   |                      | 2,15  | -0,34            | 1475,75969                      |
| 213-226   | RDLVRNGVDPTSFF                  |                      | 3,66  | 0,93             | 1622,83013                      |
| 231-258   | VAGDSPVANGDPSVGSVEAGSHTAVHRW    |                      | 4,24  | 0,13             | 2759,31369                      |
| 259-274   | VGDPTQPNNEDmGNFY                | M12(Oxidation)       | 4,11  | 0,2              | 1813,73381                      |
| 259-274   | VGDPTQPNNEDMGNFY                |                      | 4,51  | 0,29             | 1797,73906                      |

|         |                     |                                |      |       |            |
|---------|---------------------|--------------------------------|------|-------|------------|
| 275-283 | SAGYDPVFY           |                                | 2,2  | 0,17  | 1018,45183 |
| 300-313 | RLPGHVDITDPDWL      |                                | 4,24 | -0,11 | 1633,83318 |
| 318-326 | VFYDENKDL           |                                | 2,55 | 0,6   | 1142,53716 |
| 320-330 | YDENKDLVRVY         |                                | 3,44 | 0,3   | 1413,70134 |
| 321-330 | DENKDLVRVY          |                                | 3,51 | -0,27 | 1250,63725 |
| 331-340 | NKDcVNLDKL          | C4(Carbamidomethyl)            | 3,64 | 0,52  | 1218,61539 |
| 331-342 | NKDcVNLDKLY         | C4(Carbamidomethyl)            | 5,04 | 0,55  | 1509,77387 |
| 343-354 | NFIENSKEVFPW        |                                | 3,99 | 0,51  | 1509,73808 |
| 345-354 | IENSKEVFPW          |                                | 3,04 | 0,04  | 1248,62602 |
| 421-428 | DSGKFVKF            |                                | 2,45 | 0,55  | 927,49401  |
| 421-431 | DSGKFVKFDVF         |                                | 2,9  | 0,09  | 1288,6574  |
| 429-441 | DVFNLDKLDGVF        |                                | 4,03 | 0,5   | 1495,77995 |
| 432-441 | VNDKLDGVF           |                                | 2,88 | -0,22 | 1134,61516 |
| 442-453 | TTPcDPEYAGGF        | C4(Carbamidomethyl)            | 4,06 | -4,13 | 1314,52532 |
| 454-472 | AQIPHNDKRSmVmTSTARF | M11(Oxidation); M13(Oxidation) | 2,57 | 0,93  | 2222,08266 |
| 454-472 | AQIPHNDKRSMVmTSTARF | M13(Oxidation)                 | 2,1  | 0,4   | 2206,08657 |
| 489-502 | ATVTLVPRTGcEDL      | C11(Carbamidomethyl)           | 2,91 | -0,12 | 1531,77837 |
| 494-502 | VPRTGcEDL           | C6(Carbamidomethyl)            | 2,04 | -0,11 | 1046,49346 |
| 503-517 | TVGEIKIELVPIPKA     |                                | 3,76 | -0,13 | 1606,97771 |

Fig. S 1 Affinity chromatographic (FPLC) run of *cgAUS1* wild type on GStap FF. Legend: — UV absorbance at 280 nm [mAU], — UV absorbance at 345 nm [mAU], — gradient [% buffer B].

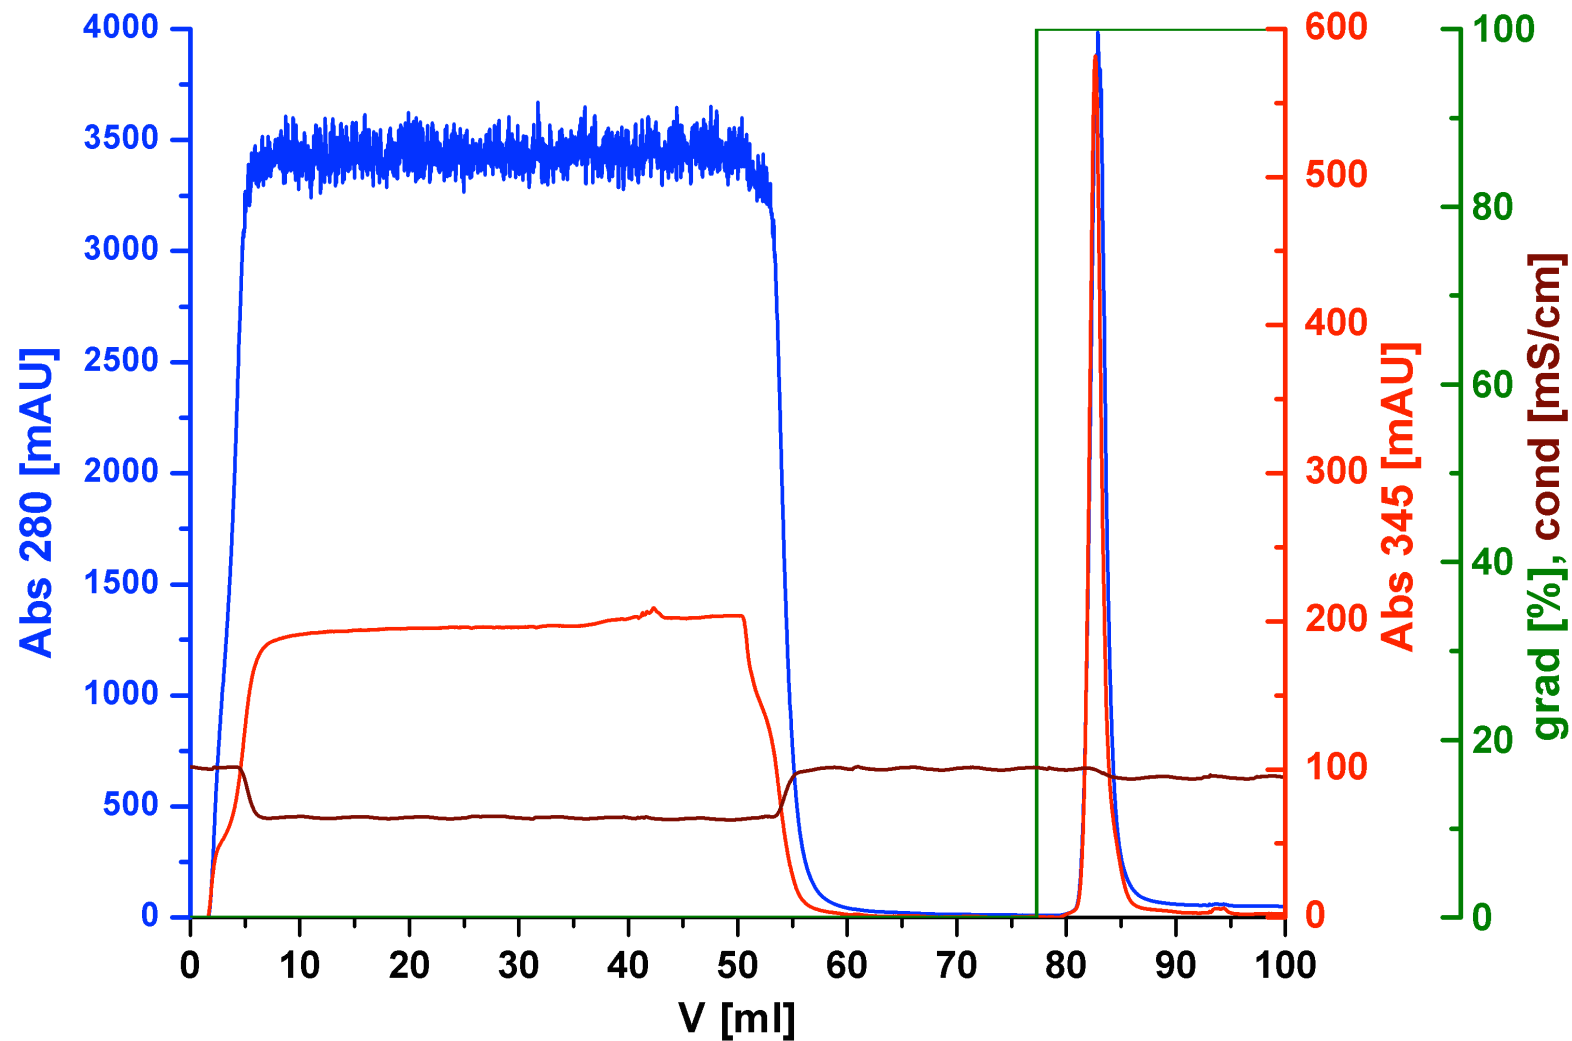

Supplement: mmc1.pdf [file mmc1.pdf]
